# Supplementary material
Source: PubMed Central journal article supplement (PMC4459475)
Supplement: 10750_2012_1062_MOESM1_ESM.pdf [file 10750_2012_1062_MOESM1_ESM.pdf]

Suppl. Table 1: List of phytoplankton species part of genera contributing >5% to total phytoplankton biovolume recorded at sampling points NG1-4 and KO5 (Fig. 2, 3).

**Cyanobacteria:**

*Anabaena cf. discoidea* Schmidle  
*Anabaena* sp.  
*Anabaena cf. spiroides* Klebahn  
*Cylindrospermopsis africana* Komárek & Kling  
*Merismopedia africana* Komárek & Cronberg  
*Merismopedia tenuissima* Lemmermann  
*Merismopedia glauca* (Ehrenberg) Nägeli  
*Merismopedia punctata* Meyen  
*Microcystis panniformis* Komárek  
*Microcystis protocystis* Crow  
*Microcystis botrys* Teiling  
*Microcystis wesenbergii* Komárek  
*Planktolyngbya circumcreta* G.S. West  
*Planktolyngbya contorta* Lemmermann  
*Planktolyngbya limnetica* Lemmerman  
*Planktolyngbya tallingii* Komárek & Kling

**Bacillariophyceae:**

*Aulacoseira ambigua* (Grunow) O. Müller  
*Aulacoseira granulata* Ehrenberg  
*Cyclostephanos* sp.  
*Cyclotella meneghiniana* Kützing  
*Cyclotella* sp.  
*Nitzschia dissipata* (Kützing) Grunow  
*Nitzschia lacustris* Hustedt  
*Nitzschia* sp.  
*Nitzschia victoriae* Sitoki & Rott (in prep.)  
*Nitzschia kavirondoensis* Sitoki & Rott (in prep.)  
*Nitzschia mediocris* Hustedt  
*Nitzschia palea* (Kützing) W. Smith  
*Nitzschia recta* Hantzsch  
*Synedra cunningtonii* G.S. West  
*Synedra ulna* (Nitzsch) Ehrenberg  
*Urosolenia victoriae* (Schröder) Rott & Kling

**Cryptophyta:**

*Cryptomonas* sp.

**Dinophyta:**

*Glenodinium benardinense* Chodat & Zender  
*Glenodinium* sp.

**Euglenophyceae:**

*Euglena acus* Ehrenberg

*Euglena viridis* Ehrenberg

**Chlorococcales:**

*Ankistrodesmus falcatus* (Corda) Ralfs

*Ankistrodesmus fusiformis* Corda

*Ankyra judayi* Corda

*Coelastrum cambricum* W. Archer

*Coelastrum indicum* Turner

*Coelastrum microporum* var. *microporum* Nägeli

*Coelastrum pulchrum* var. *pulchrum* Schmidle

*Oocystis lacustris* Chodat

*Oocystis marssonii* Lemmermann

*Oocystis parva* West et G.S. West

*Oocystis tainoensis* (Komárek) F. Hindák

*Pediastrum boryanum* (Turpin) Meneghini

*Pediastrum duplex* Meyen

*Pediastrum tetras* (Ehrenberg) Ralfs

*Scenedesmus* sp.

*Selenestrum* sp.

**Zygnematophyceae:**

*Staurastrum gracile* var. *nyansae* (Ralfs) G.S. West

*Staurastrum planktonicum* Teiling

*Staurastrum limneticum* Schmidle
